# Supplementary material for: Compatibility Study of Peptide and Glycerol Using Chromatographic and Spectroscopic Techniques: Application to a Novel Antimicrobial Peptide Cbf-14 Gel
Source: MDPI journal article supplement (doi:10.3390/pharmaceutics15122784), 2023-12-15
Supplement: s1 [file s1]

Electronic Supplementary Material for

# Compatibility Study of Peptide and Glycerol Using Chromatographic and Spectroscopic Techniques: Application to a Novel Antimicrobial Peptide Cbf-14 Gel

Jixue Yang <sup>1</sup>, Yitong Huo <sup>1</sup>, Xin Jin <sup>1</sup>, Meiyun Liu <sup>1</sup>, Yuting Lu <sup>1</sup>, Lingman Ma <sup>2</sup>, Changlin Zhou <sup>2</sup>, Taijun Hang <sup>1</sup> and Min Song <sup>1,\*</sup>

<sup>1</sup> Department of Pharmaceutical Analysis, China Pharmaceutical University, Nanjing 211198, China; 3221010221@stu.cpu.edu.cn (J.Y.); 3219010166@stu.cpu.edu.cn (Y.H.); 3221010469@stu.cpu.edu.cn (X.J.); 3319010364@stu.cpu.edu.cn (M.L.); luyt@cpu.edu.cn (Y.L.); hangtj@cpu.edu.cn (T.H.)

<sup>2</sup> State Key Laboratory of Natural Medicines, School of Life Science and Technology, China Pharmaceutical University, Nanjing 211198, China; malingman1987@126.com (L.M.); cl\_zhou@cpu.edu.cn (C.Z.)

\* Correspondence: songmin@cpu.edu.cn; Tel.: +86-1358-40-52217

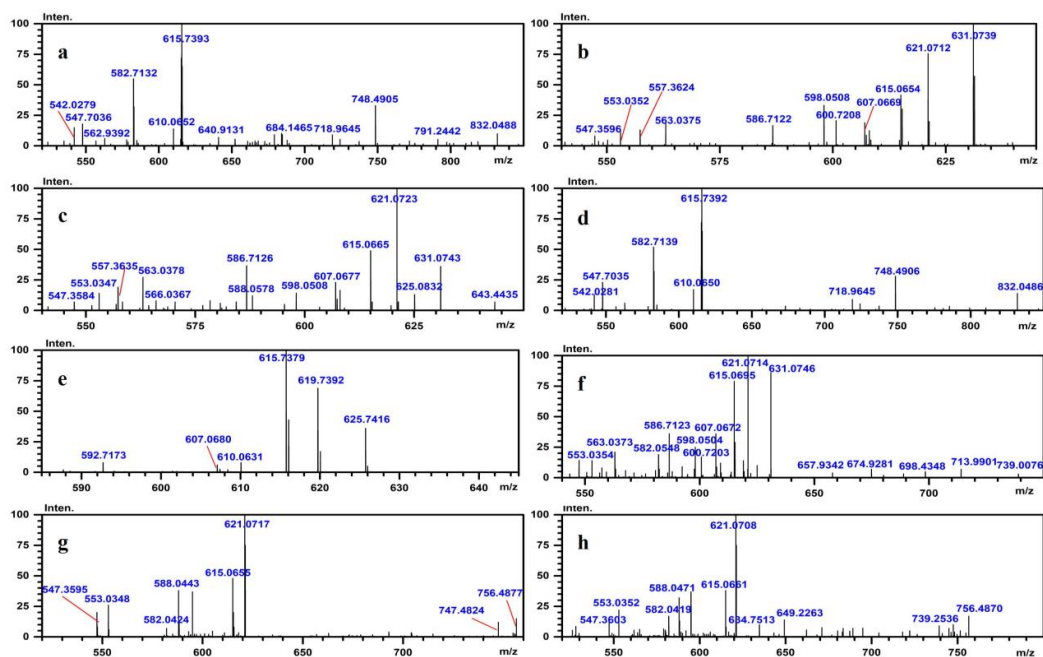

**Figure S1.** The secondary mass spectra of (a) impurity 1,  $m/z$  615.7393; (b) impurity 3,  $m/z$  631.0739; (c) impurity 5,  $m/z$  631.0743; (d) impurity 7,  $m/z$  615.7392; (e) impurity 8,  $m/z$  625.7416; (f) impurity 9,  $m/z$  631.0746; (g) impurity 10,  $m/z$  621.0717; (h) impurity 11,  $m/z$  621.0708.

**a**

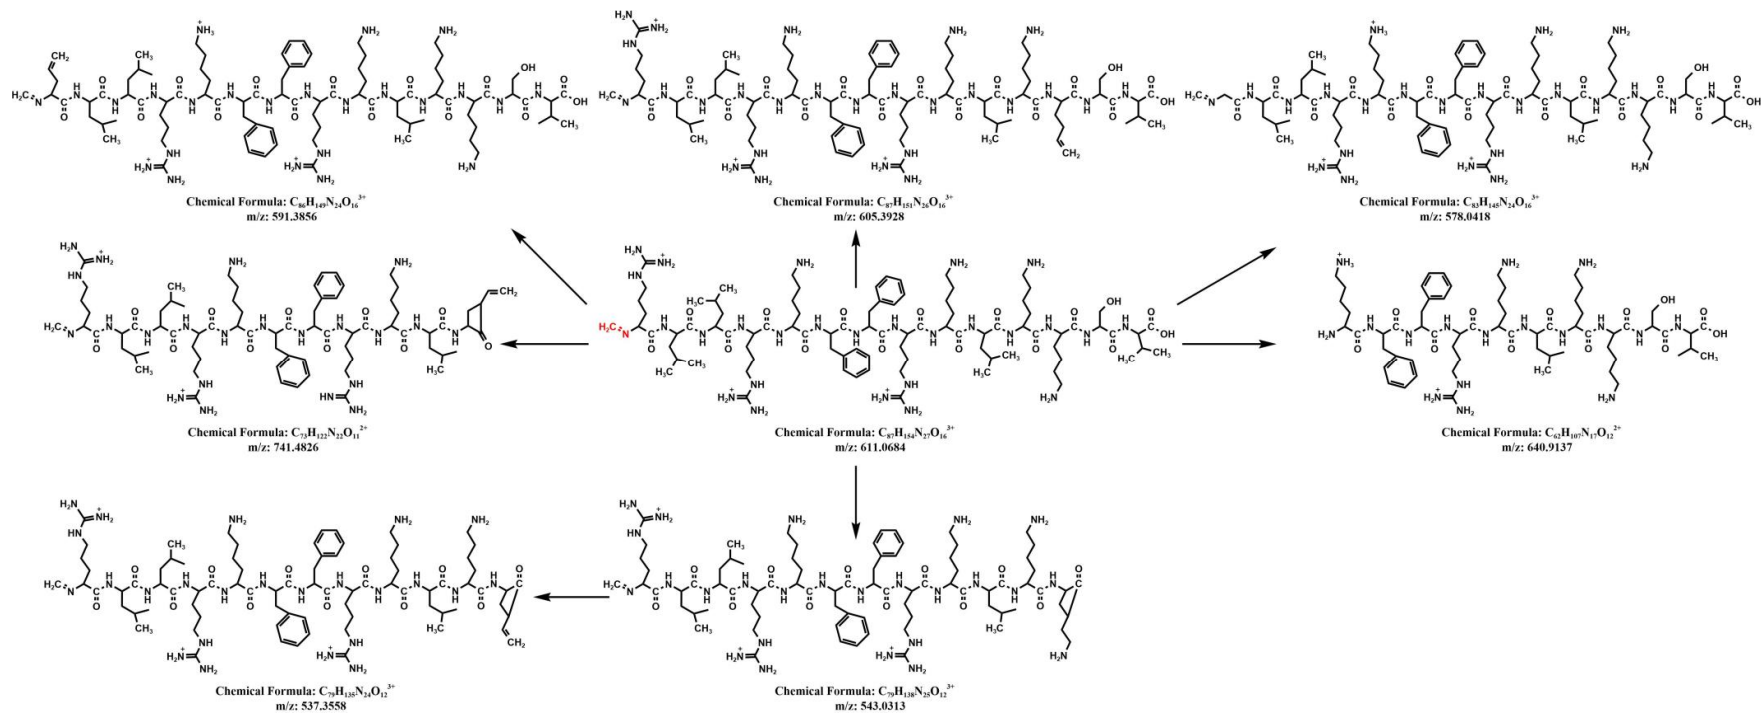

**b**

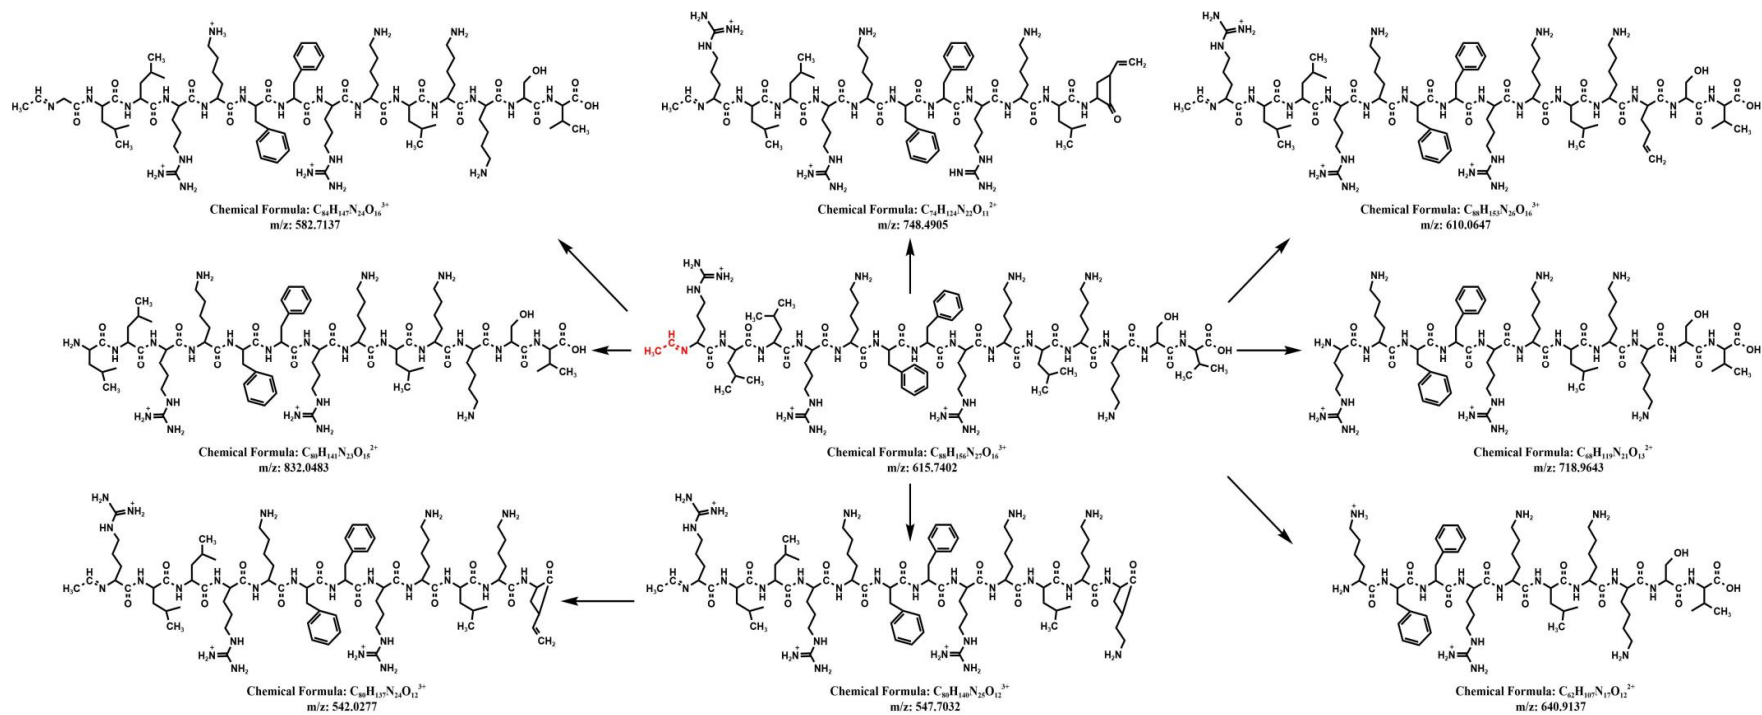

c

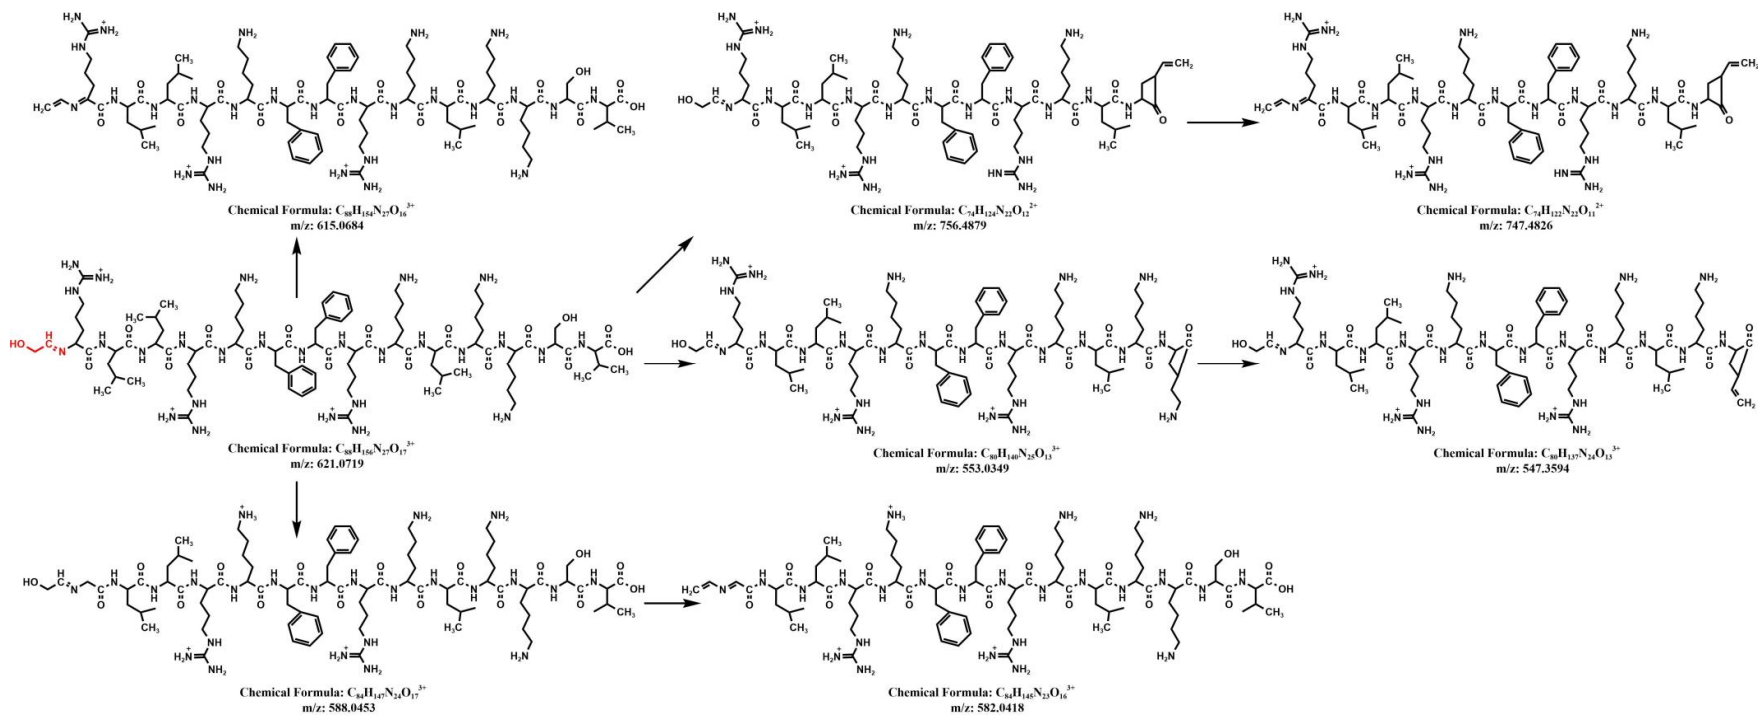

d

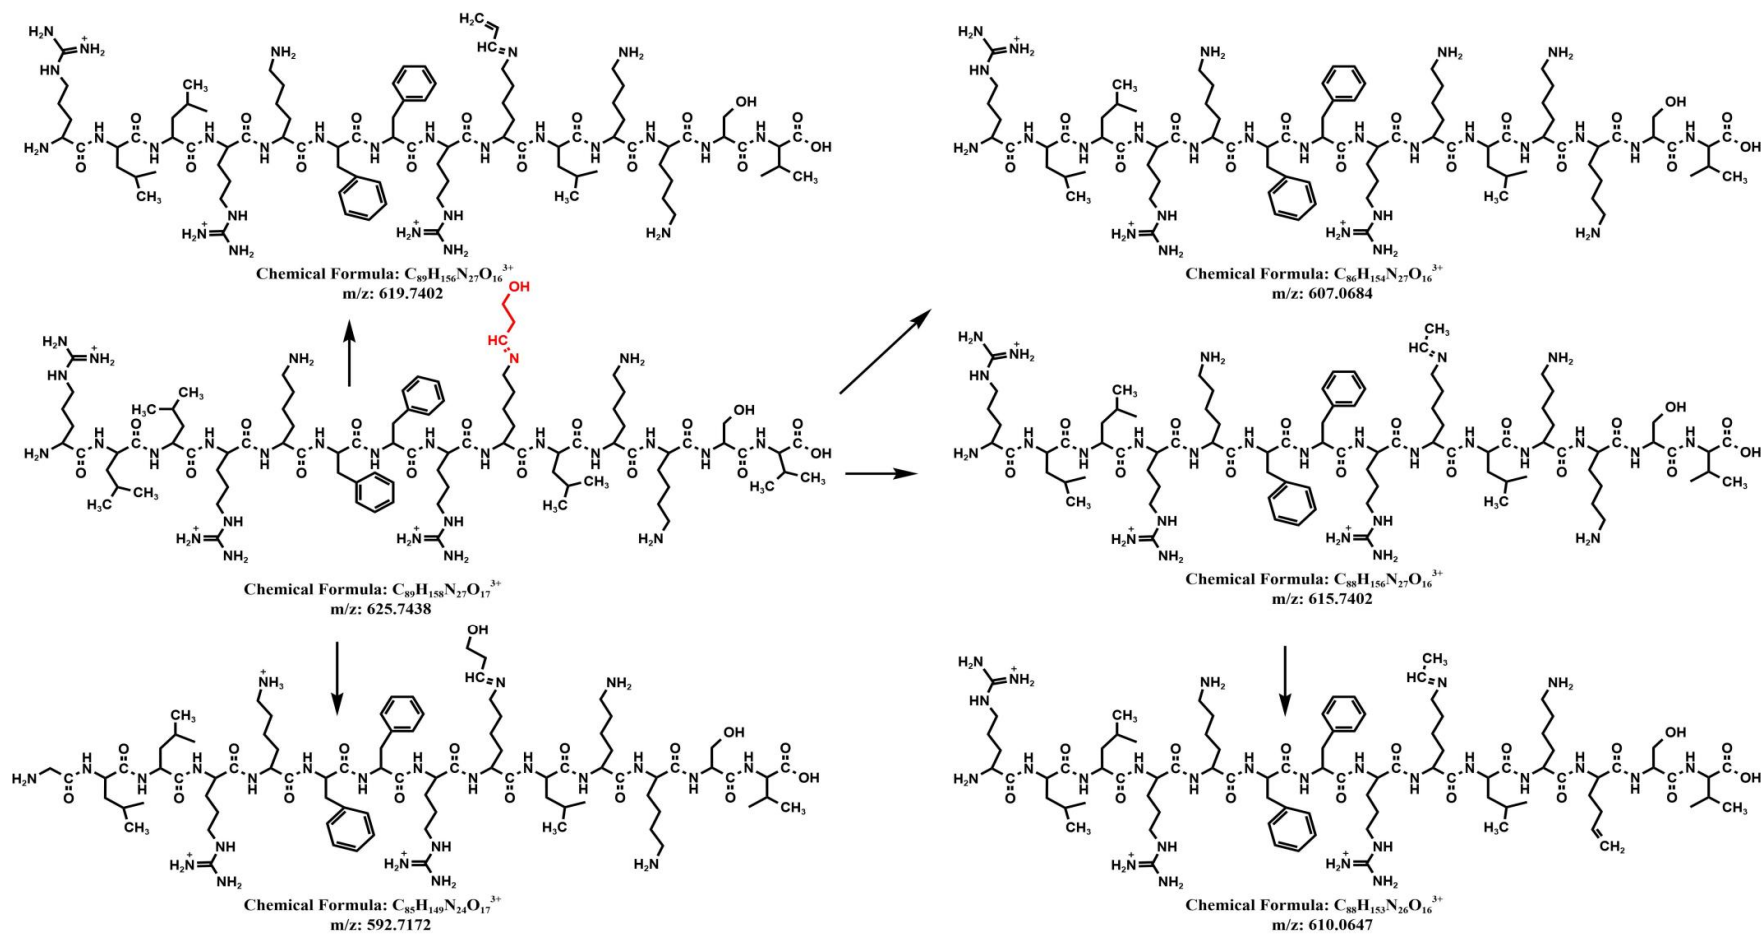

e

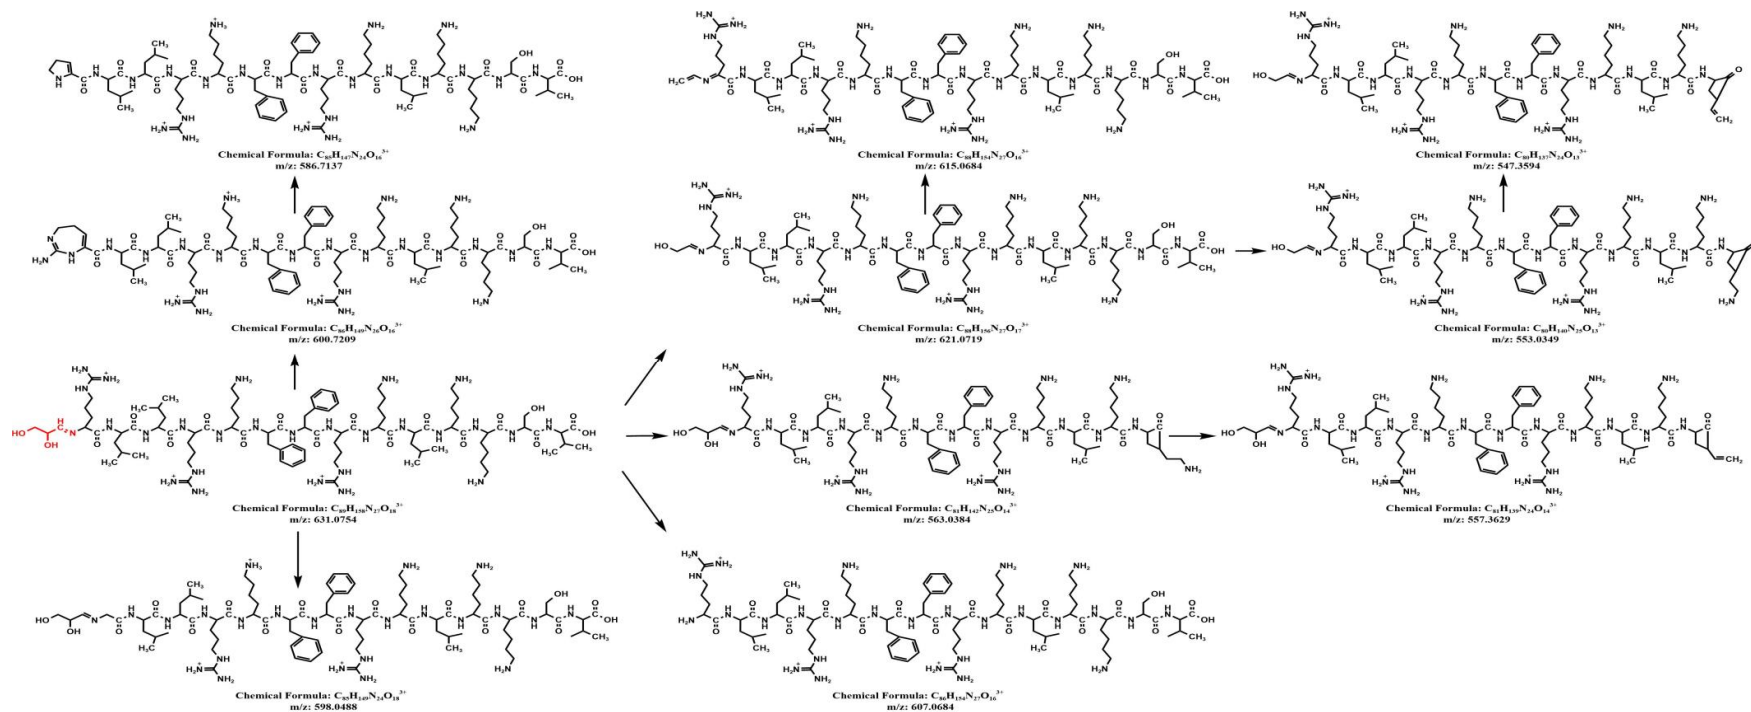

**Figure S2.** Plausible fragmentation pathways of (a) N-methylene-Cbf-14 (represented as impurity 2, and impurity 4, 6 were similar); (b) N-ethylidene-Cbf-14 (represented as impurity 1, and impurity 7 was similar); (c) N-(2-hydroxyethylidene)-Cbf-14 (represented as impurity 10, and impurity 11 was similar); (d) N-(3-hydroxypropylidene)-Cbf-14 (impurity 8); (e) N-(2,3-dihydroxypropylidene)-Cbf-14 (represented as impurity 3, and impurity 5, 9 were similar).

**a**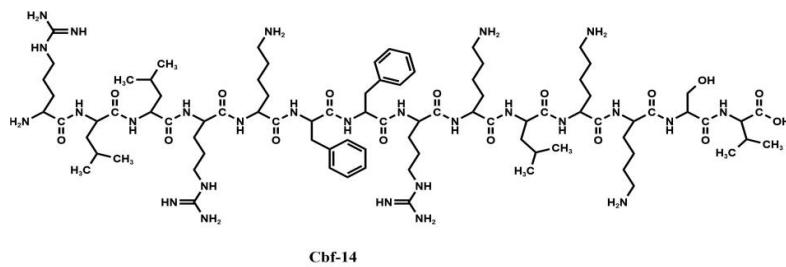**b**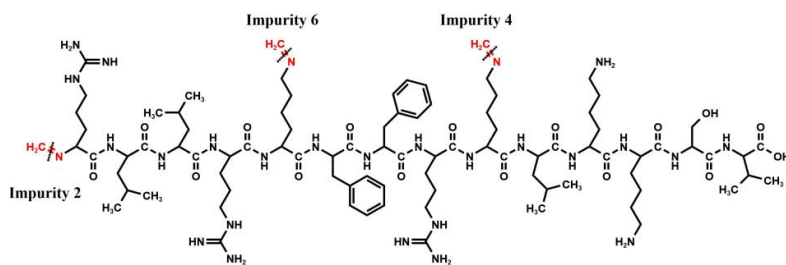**c**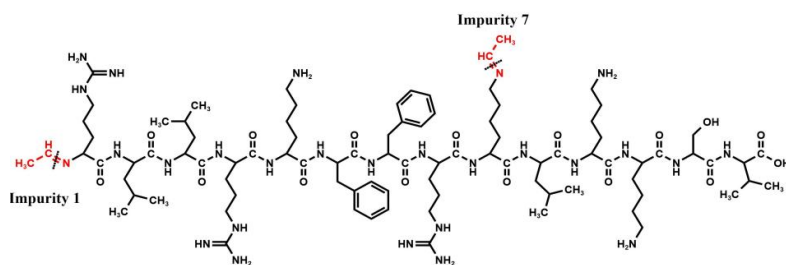**d**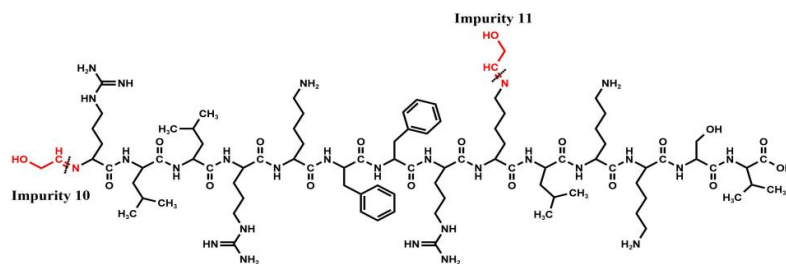**e**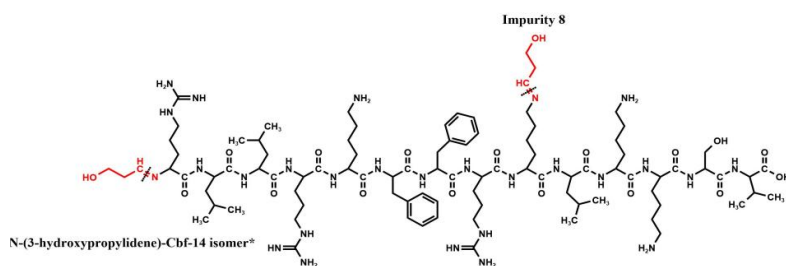**f**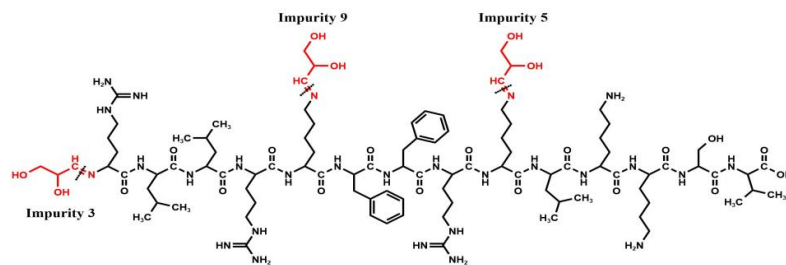



**Figure S3.** Deduced structures of compounds in this study. (a) Cbf-14; (b) N-methylene-Cbf-14 (impurity 2, 4, 6); (c) N-ethylidene-Cbf-14 (impurity 1, 7); (d) N-(2-hydroxyethylidene)-Cbf-14 (impurity 10, 11); (e) N-(3-hydroxypropylidene)-Cbf-14 (impurity 8); (f) N-(2,3-dihydroxypropylidene)-Cbf-14 (impurity 3, 5, 9).  
\* The impurity formed when Cbf-14 reacted with 3-hydroxypropanal (as shown in Fig 3e at  $t_R$  24.8 min) was not detected in the gel.
